# Supplementary figures and images for: Prolonged Intrinsic Neural Timescales Dissociate from Phase Coherence in Schizophrenia
Source: MDPI journal article supplement (doi:10.3390/brainsci13040695), 2023-04-21

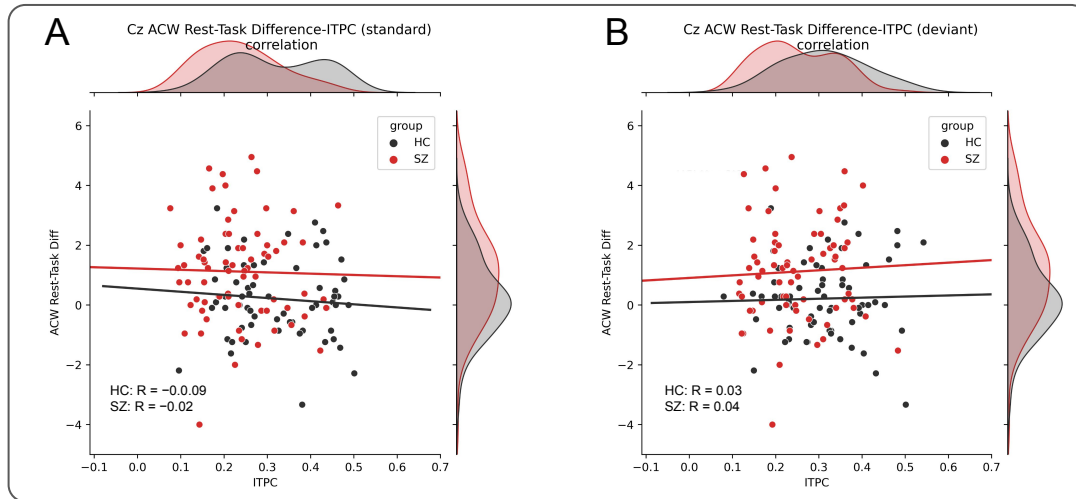

Supplement: s1 [file s1]
